# Supplementary material
Source: Springer Nature journal article supplement (https://www.springermedizin.de/resource/supplementary/12985_2007_348_MOESM1_ESM.pdf/9607578)

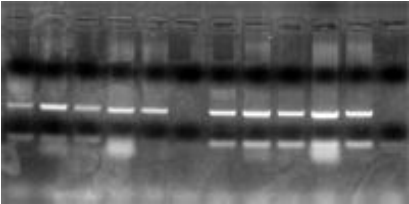

**1 2 3 4 5 6 7 8 9 10 11 12**

Supplement: MOESM1 [file 9607578]
